# Supplementary material for: Zn(ii)-Curcumin supplementation alleviates gut dysbiosis and zinc dyshomeostasis during doxorubicin-induced cardiotoxicity in rats
Source: Royal Society of Chemistry journal article supplement (doi:10.1039/c9fo01034c), 2019-01-01
Supplement: c9fo01034c1.pdf [file c9fo01034c1.pdf]

## Electronic supplementary information

### Tables

**Table S1.** Target gene primers

| Gene         | Forward (5' to 3')       | Reverse (5' to 3')      |
|--------------|--------------------------|-------------------------|
| <i>Gapdh</i> | TATAGCGAGAGGGACCCAGC     | GACTCTCTTTGCACCACCCT    |
| <i>INFy</i>  | TGAGCATCGCCAAGTTCGAG     | CCTTTTCCGCTTCCTTAGGCT   |
| IL-6         | GCCCACCAGGAACGAAAGTC     | TGGCTGGAAGTCTCTTGCGG    |
| <i>Tnfa</i>  | GTCCAACAAGGAGGAGAAGT     | TTTGCTACGACGTGGGCTAC    |
| IL-1 $\beta$ | CAGGATGAGGACCCAAGCAC     | GTCGTCATCATCCCACGAGT    |
| MCP-1        | GCAGGTCTCTGTCACGCTTC     | GGCATTAACTGCATCTGGCTGA  |
| Cdx2         | GGAAGCCAAGTGAAAACCAG     | CTTTCCTCCTGATGGTGATG    |
| Klf3         | GGCACAACGGTCAGATACGG     | AGGAACCCAAGAGCCAAGAT    |
| Tff3         | ACCCTGCTGCTGGTCCTGGTTGCT | CCACAGTCCACCCTGACATTTGC |
| Muc2         | TCCCTCTTACAAGGGCAATG     | TTCCAGCTGTTCCCAAAGTC    |

**Table. S2** Primary antibodies used in western blot analysis

| Primary antibody    | Company                                        | Catalog No.  | Source | Concentration used |
|---------------------|------------------------------------------------|--------------|--------|--------------------|
| Egr-1               | Santa Cruz Biotechnology (Heidelberg, Germany) | sc-101033    | Mouse  | 1:1000             |
| BAX                 | Affinity (Cincinnati, OH, USA)                 | AF0120       | Rabbit | 1:3000             |
| Bcl-2               | Boster (Wuhan, China)                          | A00040-1     | Rabbit | 0.5 $\mu$ g/mL     |
| Metallothionein, MT | Abcam (Cambridge, UK)                          | ab12228      | Mouse  | 1:1000             |
| SLC30A1, ZnT-1      | EterLife (Birmingham, UK)                      | EL901929-100 | Rabbit | 1:1000             |
| SLC39A4, ZIP4       | EterLife                                       | EL902534-100 | Rabbit | 1:2000             |
| SLC39A5, ZIP5       | EterLife                                       | EL917000-100 | Rabbit | 1:1000             |
| ZO-1                | Invitrogen (Carlsbad, CA, USA)                 | 61-7300      | Rabbit | 5 $\mu$ g/mL       |
| Occludin            | Invitrogen                                     | 33-1500      | Mouse  | 0.1 $\mu$ g/mL     |
| $\beta$ -actin      | Proteintech Group (Rosemont, IL, USA)          | 20536-1-AP   | Rabbit | 1:5000             |

## Figure Legends

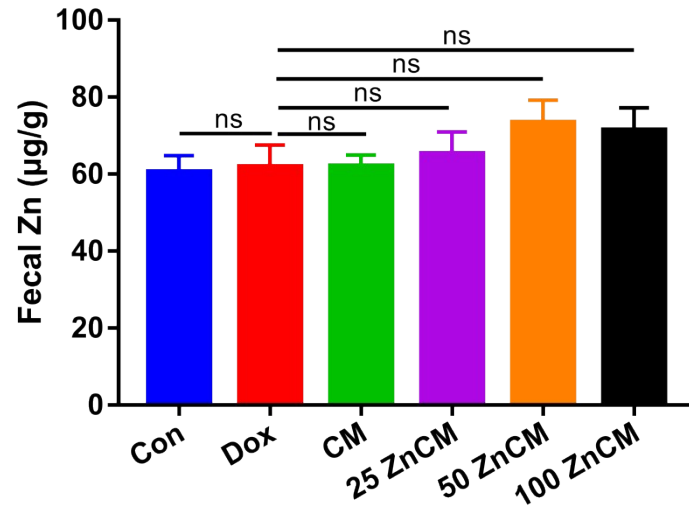

**Fig. S1.** The zinc level in feces from donors.

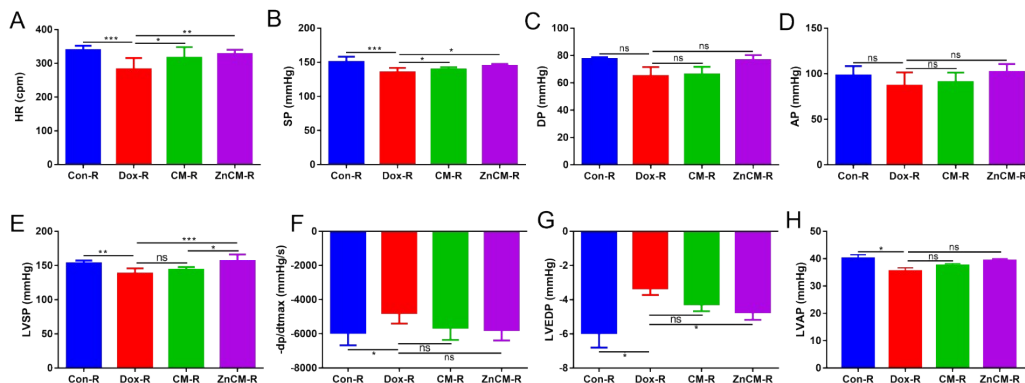

**Fig. S2.** Parameters of cardiac function of recipient rats determined by the Biological Function Experiment System. HR, heart rate; SP, systolic blood pressure; DP, diastolic blood pressure; AP, average blood pressure; LVSP, left ventricular systolic pressure; +dp/dtm, maximum rate of contraction; -dp/dtm, minimum rate of contraction; LVEDP, left ventricular end diastolic pressure
